# Supplementary material for: Cryo-EM structures of MERS-CoV and SARS-CoV spike glycoproteins reveal the dynamic receptor binding domains
Source: PubMed Central journal article supplement (PMC5394239; doi:10.1038/ncomms15092), 2017-04-10
Supplement: ncomms15092-s1.pdf [file ncomms15092-s1.pdf]

**Supplementary Figures and Tables:**

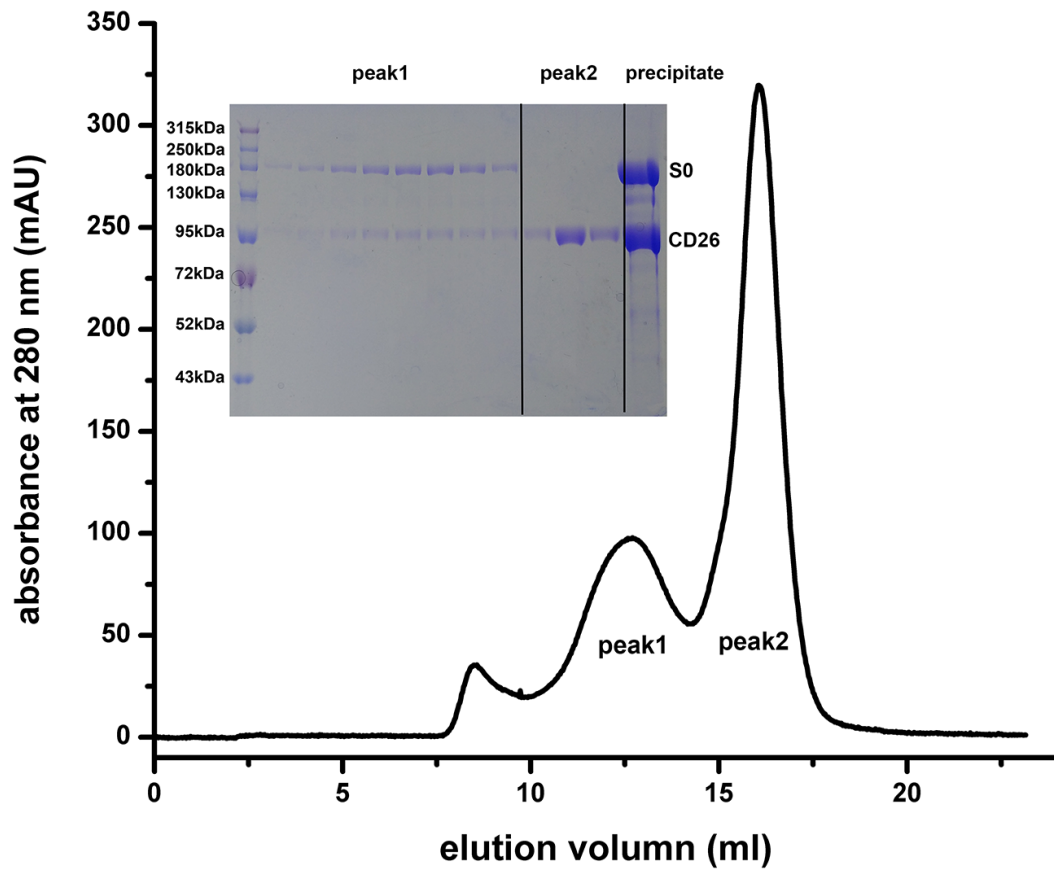

**Supplementary Fig. 1 Gel filtration profile of uncleaved MERS-CoV S ectodomain trimer in complex with excessive CD26 protein.** Most of the complex protein forms precipitant. MERS-CoV S trimer and CD26 can survive in the gel filtration, which is confirmed by the SDS-PAGE.

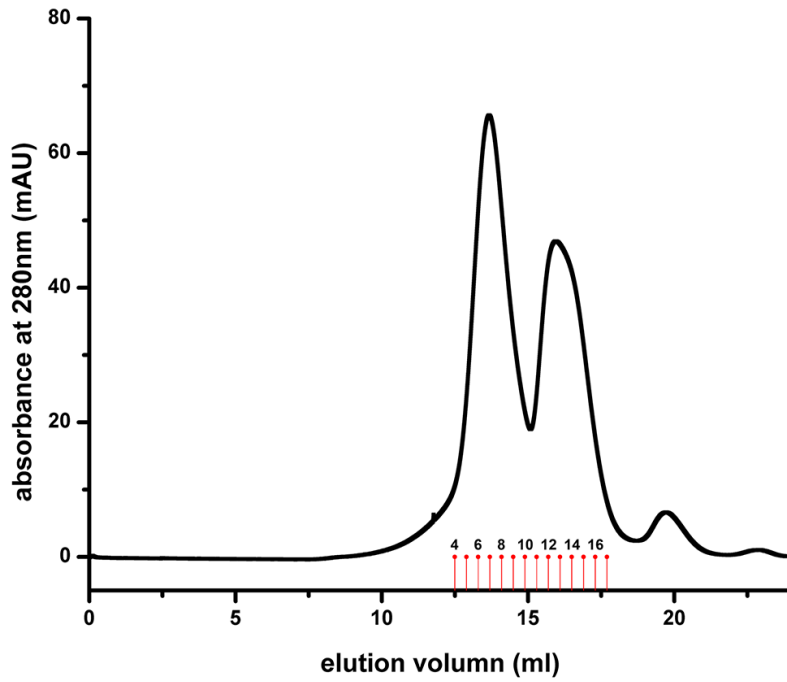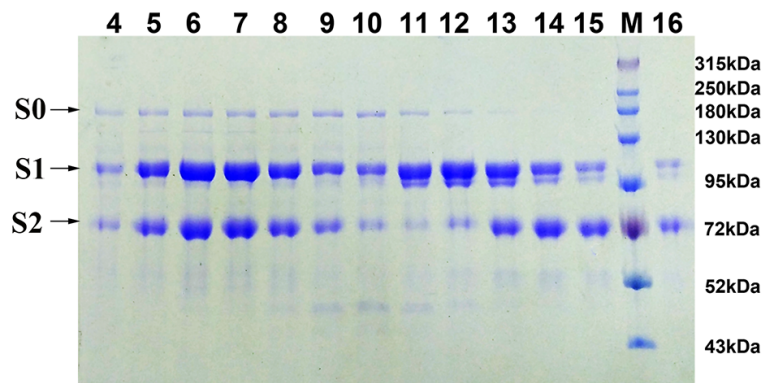

**Supplementary Fig. 2 Gel filtration profile of cleaved MERS-CoV S ectodomain protein.** There are two peaks in the gel filtration curve. One peak is the cleaved MERS-CoV S ectodomain trimer, and the other peak is a mixture of disassociated S1 and S2 subunits, confirmed by SDS-PAGE.

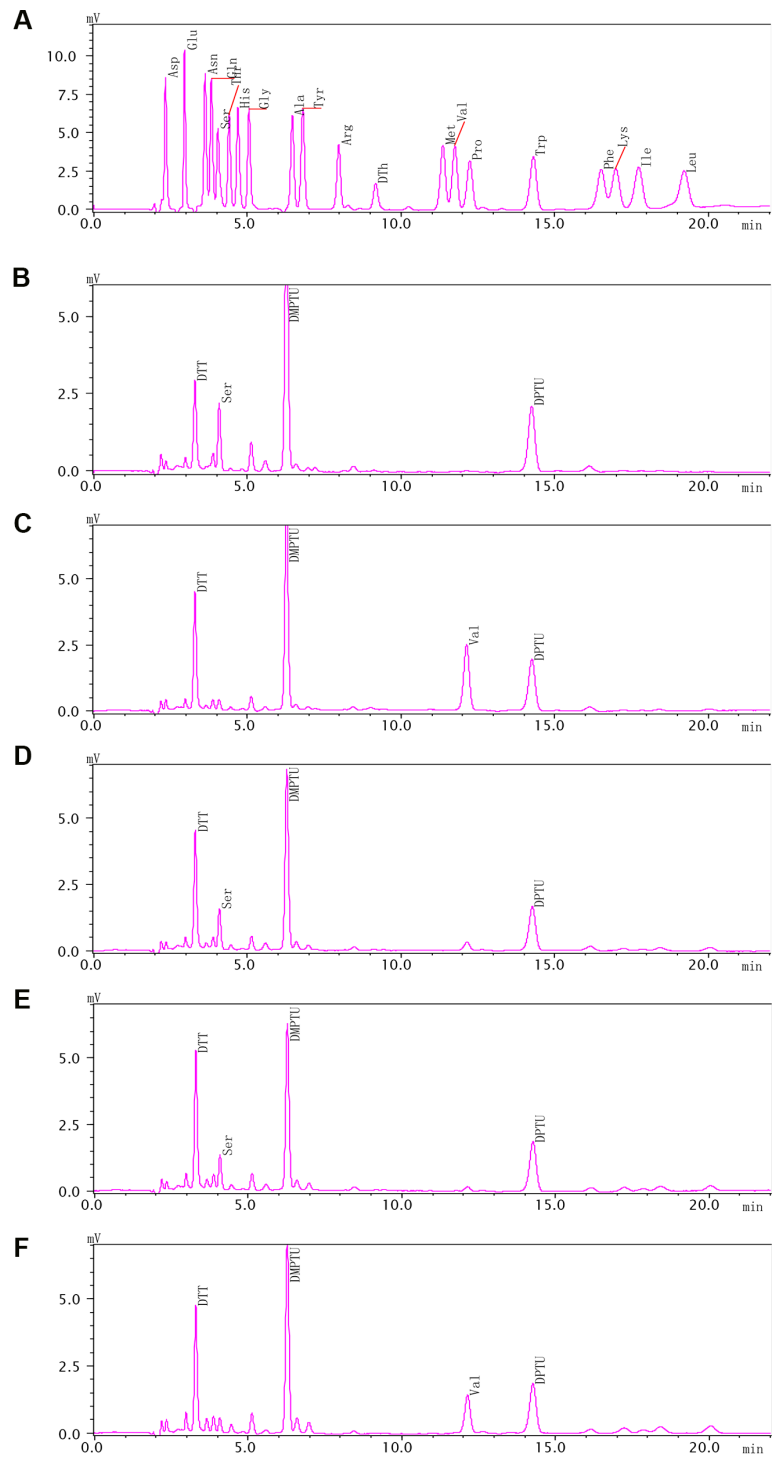

**Supplementary Fig. 3 N-terminal amino acid sequencing of the cleaved S2 subunit.** (A) Standard mass spectrometry map for different amino acids. (B-F) Mass spectrometry maps of the first five N-terminal amino acids of the S2 subunit band in Extended Data Figure 2. The maps show the first five amino acids are SVSSV.

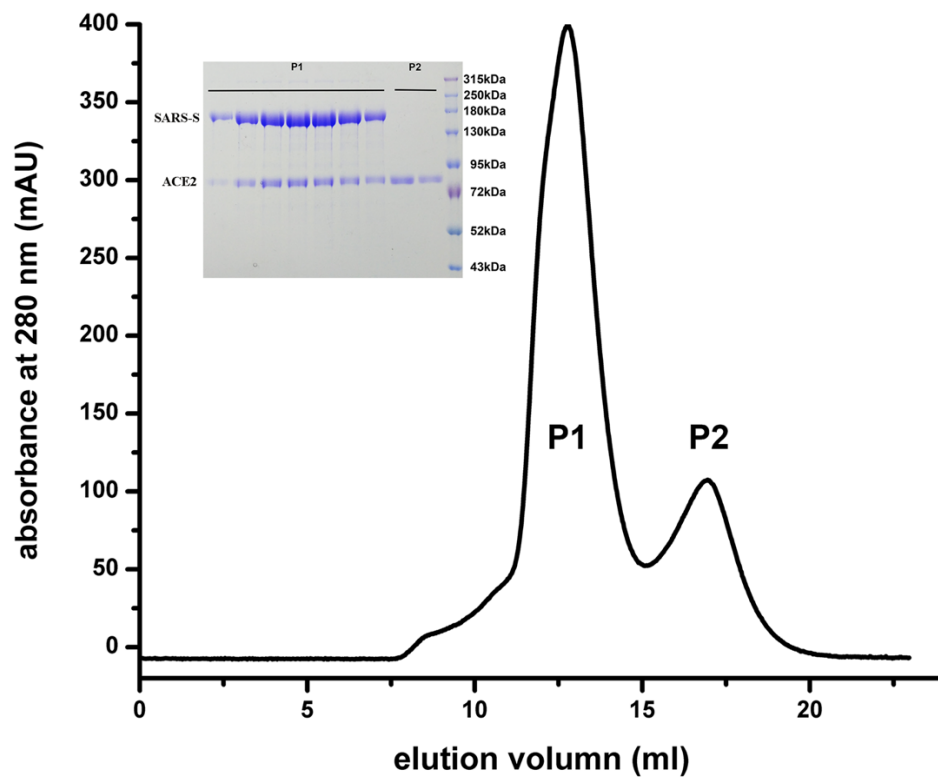

**Supplementary Fig. 4 Gel filtration profile of uncleaved SARS-CoV S ectodomain trimer in complex with excessive ACE2 protein.** SARS-CoV S trimer and ACE2 can survive in the gel filtration, which is confirmed by the SDS-PAGE.

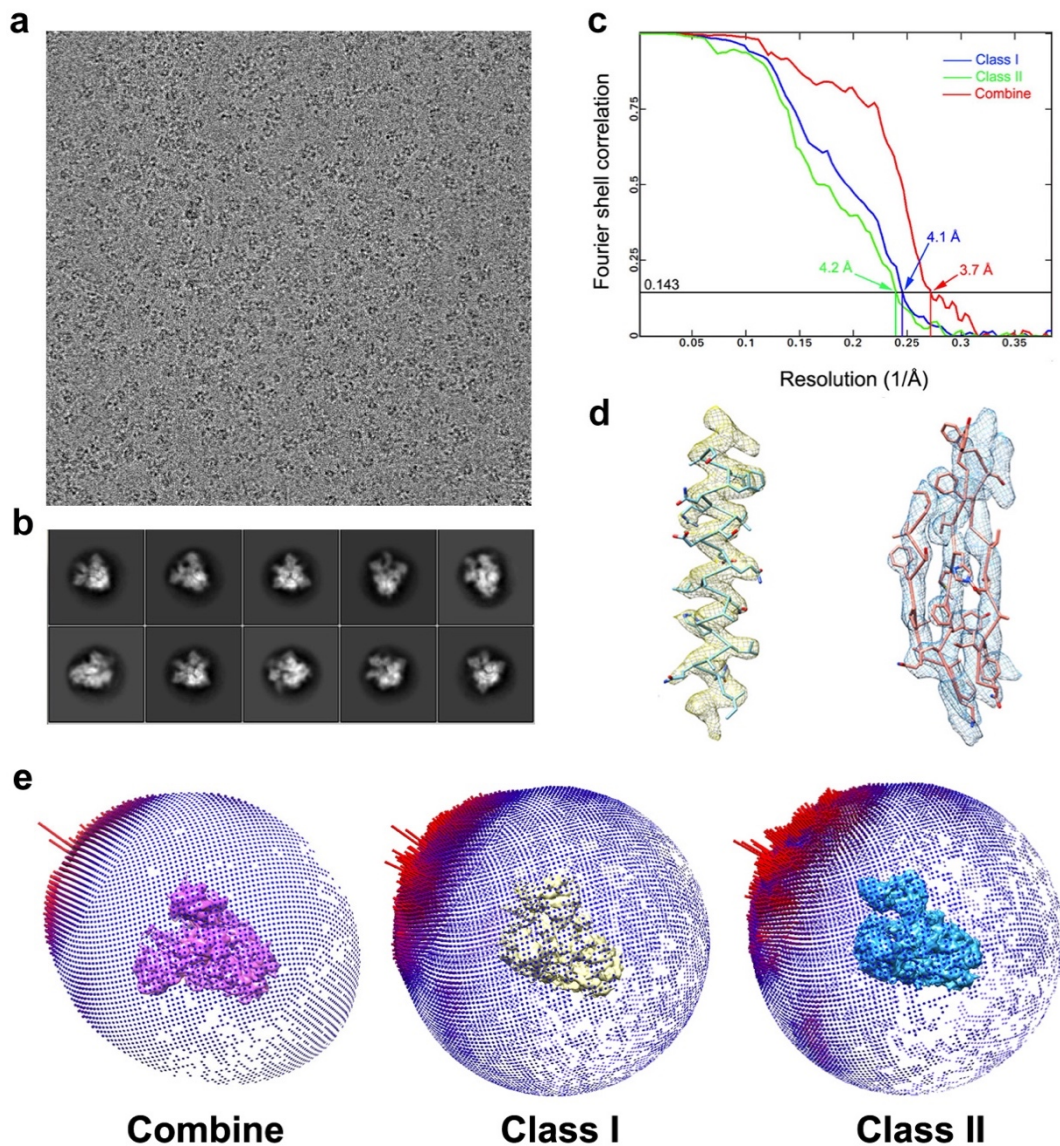

**Supplementary Fig. 5 CryoEM analysis of the MERS-CoV S trimer.** (a, b) Representative electron micrograph (defocus: 2.3 $\mu$ m) (a) and 2D class averages (b) of the MERS-CoV S trimer embedded in vitreous ice. (c) Angular distribution of the particles used in the three-fold symmetric map and class one, class two asymmetric maps. (d) Gold-standard Fourier shell correlation (FSC) curves (three-fold symmetry: red, asymmetry: blue and green). The resolution of three-fold symmetric map and asymmetric maps (Class I and Class II) were determined to 3.7 Å, 4.1 Å and 4.2 Å, respectively. The 0.143 cut-off value is indicated by a horizontal blue line. (e) Cryo-EM density for selected regions (the central helix and  $\beta$ -hairpin) of MERS-CoV S reconstruction.

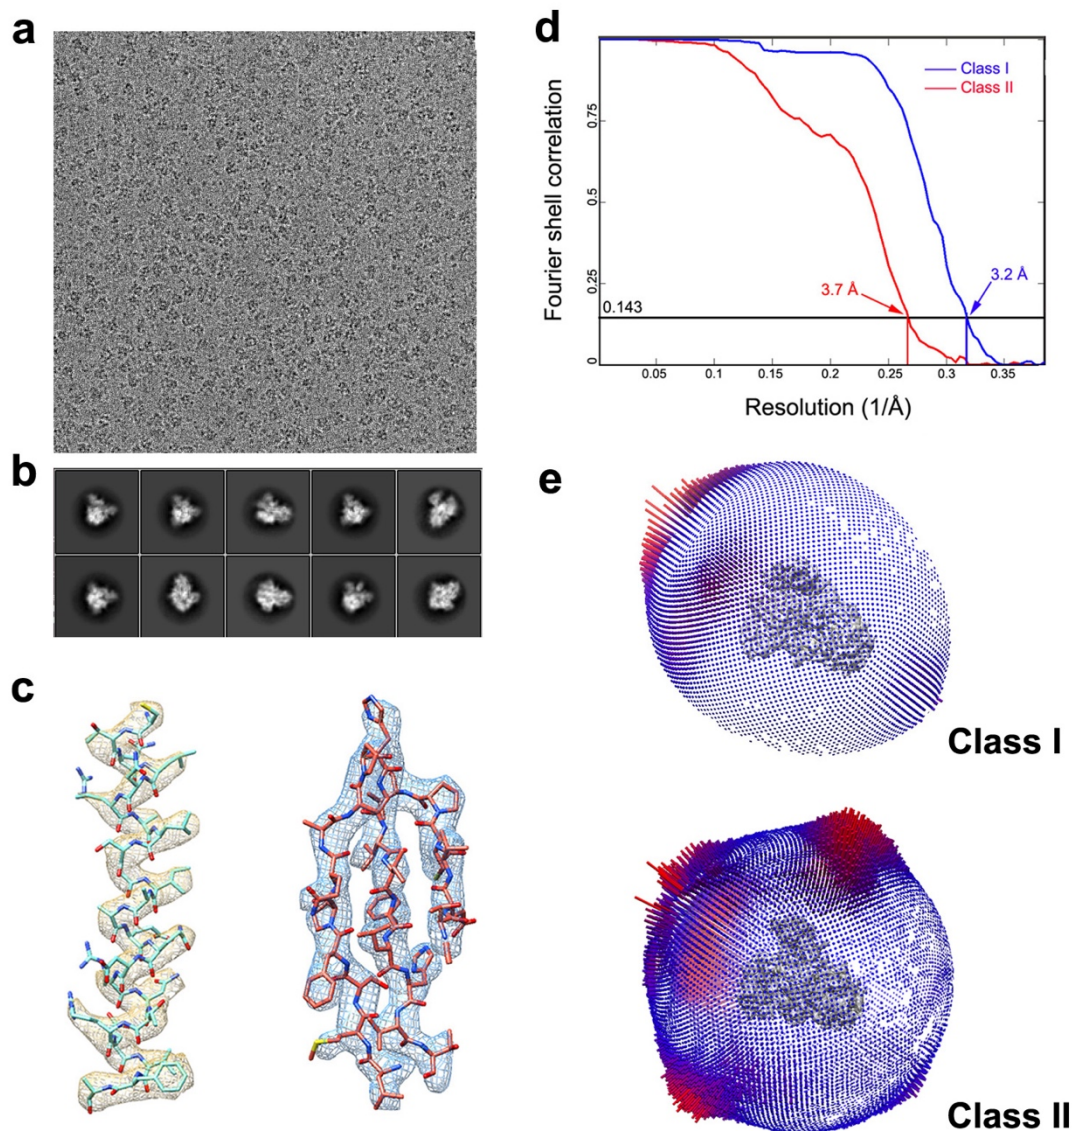

**Supplementary Fig. 6 CryoEM analysis of the SARS-CoV S trimer.**(a, b) Representative electron micrograph (defocus: 2.5 $\mu$ m) (a) and 2D class averages (b) of the MERS-CoV S trimer embedded in vitreous ice. (c) Angular distribution of the particles used in the three-fold symmetric map and asymmetric map. (d) Gold-standard Fourier shell correlation (FSC) curves (three-fold symmetry: blue, asymmetry: red). The resolution of three-fold symmetric map and asymmetric map (Class I and Class II) were determined to 3.2 Å and 3.7 Å, respectively. The 0.143 cut-off value is indicated by horizontal blue line. (e) Cryo-EM density for selected regions (the central helix and  $\beta$ -hairpin) of SARS-CoV S reconstruction.

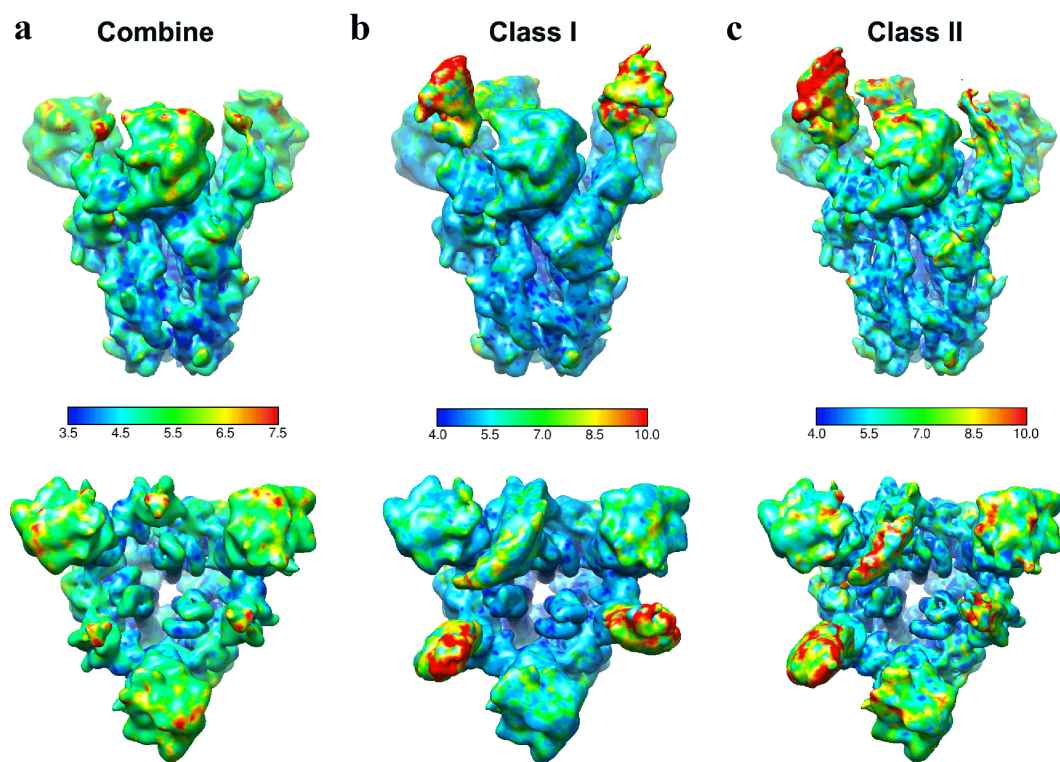

**Supplementary Fig. 7 Local resolution maps of MERS-CoV S trimer.** The three-fold symmetric map (**a**) and the asymmetric maps (**b and c**) of MERS-CoV S trimer from the side view and the top view, colored according to the resolution. The S2 part of the trimer has the resolution of  $\sim 3.5$  Å and  $4.0$  Å for symmetric map and asymmetric maps, respectively. The “standing” RBD region has a resolution of  $\sim 7$ Å. The NTD and “lying” RBD regions have the resolution of  $\sim 4.5$  Å.

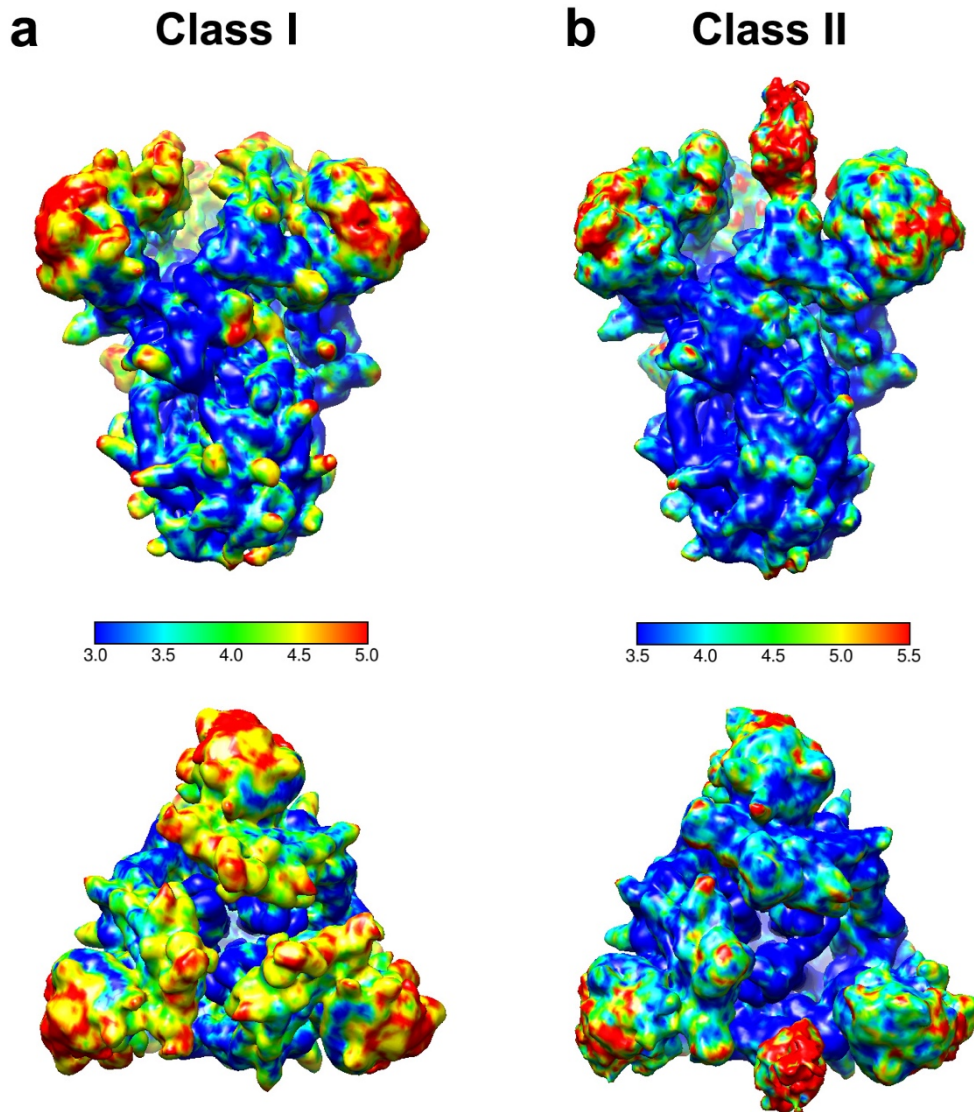

**Supplementary Fig. 8 Local resolution maps of SARS-CoV S trimer.** The three-fold symmetric map (a) and the asymmetric maps (b and c) of MERS-CoV S trimer from the side view and the top view, colored according to the resolution. The S2 part of the trimer has the resolution of  $\sim 3.0$  Å and  $3.5$  Å for symmetric map and asymmetric map, respectively. The “standing” RBD region has a resolution of  $\sim 5$ Å. The NTD and “lying” RBD regions have the resolution of  $\sim 4$ Å.



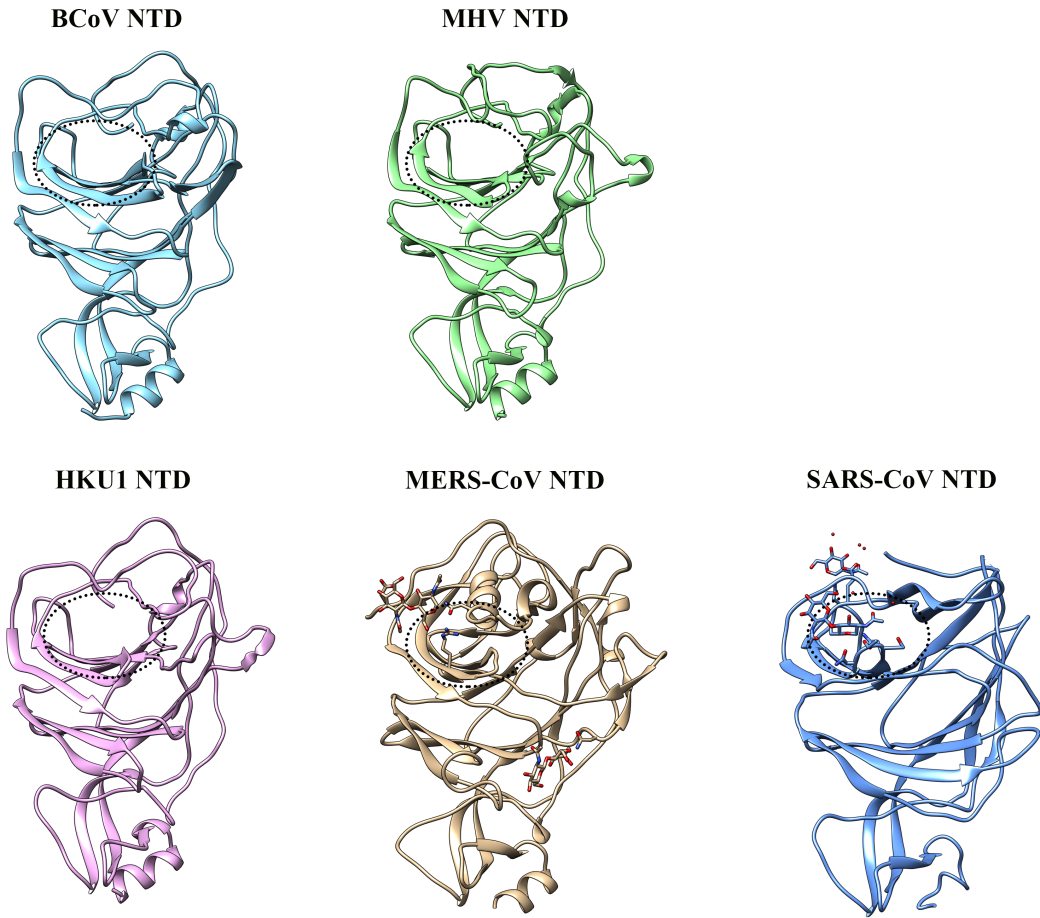

**Supplementary Fig. 9 Comparison of NTD structures from BCoV, MHV, HKU1 SARS-CoV and MERS-CoV.** MERS-CoV and SARS-CoV NTD structures fold into a galectin-like structure as in bovine coronavirus (BCoV), MHV and HKU1. However, the glycan binding site in MERS-CoV and SARS-CoV NTDs are occupied by a short helix or the glycans, preventing it to bind to host glycans. The glycan binding site are marked by dashed circles.

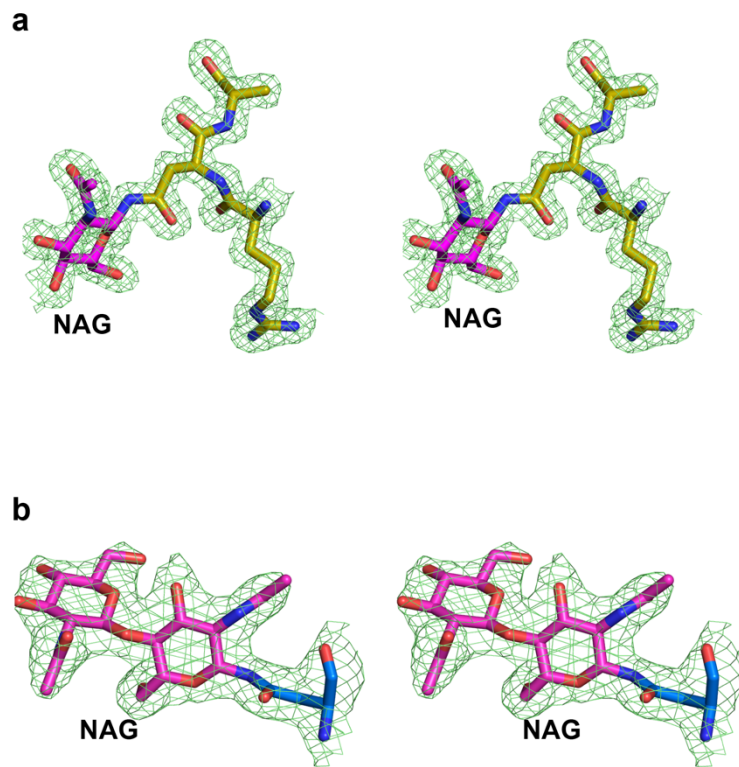

**Supplementary Fig. 10 Stereo views of crystal structures from MERS-CoV and SARS-CoV NTDs.** The 2Fo-Fc omit maps contoured at  $1 \sigma$  of the glycosylation sites in MERS-CoV (a) and SARS-CoV (b) NTDs are shown as green mesh. The glycans are shown in magenta sticks.

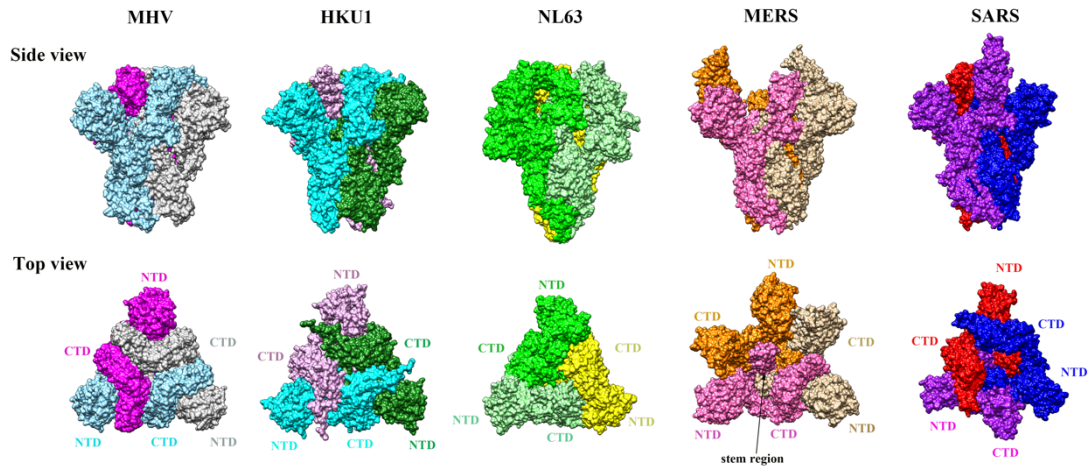

**Supplementary Fig. 11 Comparison of MHV, HKU1, NL63, SARS-CoV and MERS-CoV S trimer structures.** Only MERS-CoV S trimer shows an open conformation of S1 subunit, whereas the MHV, HKU1 and NL63 S trimers show a closed conformation of S1 subunit.

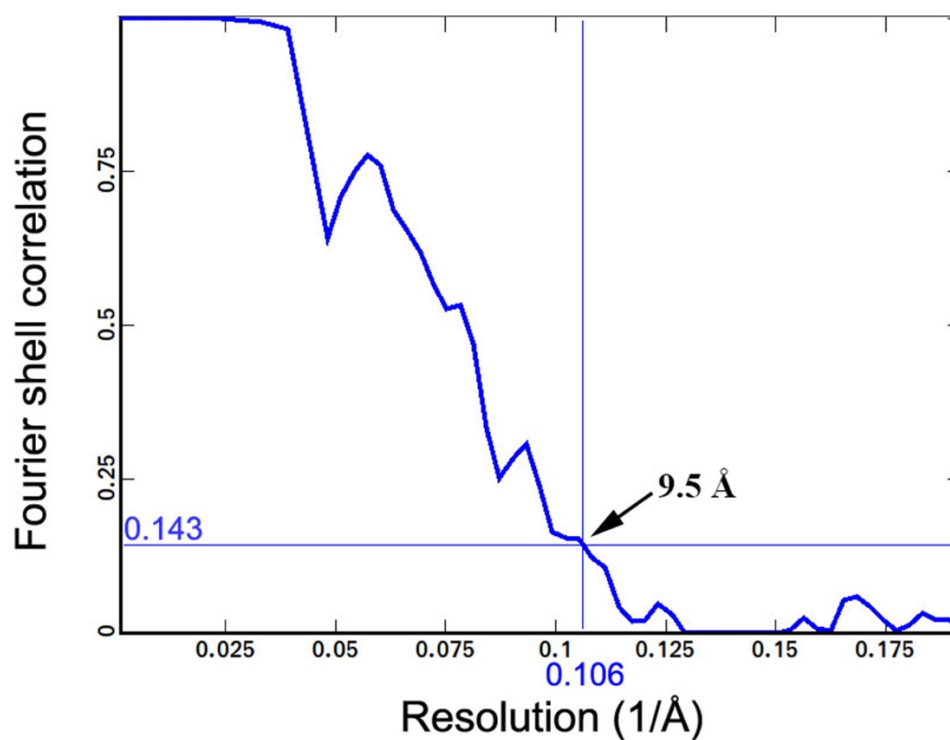

**Supplementary Fig. 12 Gold-standard (blue) Fourier shell correlation (FSC) curve of disassociated S1 trimer.** The resolution was determined to 9.5 Å. The 0.143 cut-off value is indicated by a horizontal blue line.

**Supplementary Table 1. Crystallographic data collection and refinement statistics of the MERS-CoV NTD and SARS-CoV NTD.**

|                                                     | MERS-NTD<br>(KAuCl <sub>4</sub> ) | MERS-NTD            | SARS-NTD             |
|-----------------------------------------------------|-----------------------------------|---------------------|----------------------|
| <b>Data collection</b>                              |                                   |                     |                      |
| Space group                                         | P212121                           | P212121             | P6122                |
| Cell dimensions                                     |                                   |                     |                      |
| <i>a</i> , <i>b</i> , <i>c</i> (Å)                  | 52.81, 85.50, 88.24               | 51.65, 86.61, 88.10 | 73.29, 73.29, 240.26 |
| $\alpha$ , $\beta$ , $\gamma$ (°)                   | 90.00, 90.00, 90.00               | 90.00, 90.00, 90.00 | 90.00, 90.00, 120.00 |
| Resolution (Å)                                      | 50.00-2.00 (2.07-2.00)*           | 50-1.50 (1.55-1.50) | 50-2.20 (2.28-2.20)  |
| <i>R</i> <sub>merge</sub>                           | 0.067 (0.625)                     | 0.073 (1.163)       | 0.135 (0.548)        |
| <i>I</i> / $\sigma I$                               | 37.5 (5.3)                        | 27.6 (1.6)          | 14.6 (5.9)           |
| Completeness (%)                                    | 99.5 (97.5)                       | 99.7 (99.7)         | 99.4 (100.0)         |
| Redundancy                                          | 13.4 (11.7)                       | 8.4 (8.4)           | 11.1 (14.2)          |
| <b>Refinement</b>                                   |                                   |                     |                      |
| Resolution (Å)                                      |                                   | 44.34-1.50          | 38.31-2.20           |
| No. reflections                                     |                                   | 60850               | 20247                |
| <i>R</i> <sub>work</sub> / <i>R</i> <sub>free</sub> |                                   | 0.1625/0.1946       | 0.2520/0.2826        |
| No. atoms                                           |                                   |                     |                      |
| Protein                                             |                                   | 2718                | 2194 -               |
| Ligand/ion                                          |                                   | -                   | 84                   |
| Water                                               |                                   | 356                 |                      |
| <i>B</i> -factors (Å <sup>2</sup> )                 |                                   |                     |                      |
| Protein                                             |                                   | 16.2                | 54.57                |
| Ligand/ion                                          |                                   | -                   |                      |
| Water                                               |                                   | 31.7                | 56.37                |
| R.m.s. deviations                                   |                                   |                     |                      |
| Bond lengths (Å)                                    |                                   | 0.004               | 0.003                |
| Bond angles (°)                                     |                                   | 0.958               | 0.74                 |
| Favored                                             |                                   | 96.44               | 93                   |
| Allowed                                             |                                   | 3.56                | 7.2                  |
| Outliers                                            |                                   | 0                   | 0                    |

\*Highest resolution shell is shown in parenthesis.

**Supplementary Table 2. Statistics of the structural models of the MERS-CoV and SARS-CoV S trimers refined against the 3.7 Å and 3.2 Å resolution cryo-EM maps.**

| Model statistics            | MERS-CoV S | SARS-CoV S |
|-----------------------------|------------|------------|
| FSCoverage                  | 0.7513     | 0.8864     |
| Rfactor overall             | 0.3641     | 0.3254     |
| R.m.s. deviations           |            |            |
| Bond length (Å)             | 0.0130     | 0.01       |
| Bond angles (°)             | 2.0652     | 1.2        |
| Ramachandran statistics (%) |            |            |
| Favored regions             | 78.97      | 91.92      |
| Allowed regions             | 19.72      | 8.08       |
| Outlier regions             | 1.31       | 0.00       |
| Rotamer outlier (%)         | 2.34       | 0.29       |
| Clash score                 | 12.40      | 4.77       |
